# Supplementary material
Source: PubMed Central journal article supplement (PMC7871326)
Supplement: jp0c08622_si_003.pdf [file jp0c08622_si_003.pdf]

# An Atomistic Perspective on Biomolecular Adsorption on Functionalized Carbon Nanomaterials at Ambient Conditions

## Supporting Information

Marzieh Saeedimazine, Erik G. Brandt, and Alexander P. Lyubartsev\*

*Department of Materials and Environmental Chemistry, Stockholm University, Stockholm,  
Sweden*

E-mail: [alexander.lyubartsev@mmk.su.se](mailto:alexander.lyubartsev@mmk.su.se)

# Modification of GAFF parameters for the carbon nanomaterials

We have modified the original GAFF parameters for carbon nanomaterials according to the following considerations. First, we use the established C–C bond length,  $a = 0.142$  nm (used also in Amber03 force field), for the bonds between carbon atoms in the CNTs and graphene. The equilibrium value in GAFF derived from benzene is 2% smaller. The force constants were taken directly from GAFF for CA type of atoms. Second, we used bond lengths between the CNT and the functionalized groups from the *ab initio* calculations of Milowska and Majewski<sup>1</sup> and Veloso et.al.<sup>2</sup> The force constants were taken extracted from the bonds between the corresponding atom types in the AMBER03 force field.<sup>3</sup> Third, the equilibrium angles of the COO(H)-groups were calibrated slightly to match the *ab initio* calculations of Lara et al.,<sup>4</sup> which shows that the angles in the functionalizing group contracts angles when attached to the CNT surface compared to in vacuum.

These tweaks improve the agreement with available *ab initio* calculations of bonding between CNTs and functionalizing groups, in comparison to the parameterization of the molecular fragments. The bonded force field parameters for the functionalized CNTs are given in Tables S1 and S2.

Table S1: Modified GAFF parameters for bonded atoms in the functionalized CNT. Bond equilibrium lengths,  $b_0$ , and bond force constants,  $k_b$ , were extracted from GAFF based on molecular fragments. The equilibrium bond lengths between the CNT and the functionalizing group were obtained from previous *ab initio* calculations.<sup>1,2</sup>  $b_0$  is in nm and  $k_b$  is in  $\text{kJ mol}^{-1} \text{nm}^{-2}$ .

| $i$            | $j$            | $b_0$  | $k_b$    | Description                         | Source                                                        |
|----------------|----------------|--------|----------|-------------------------------------|---------------------------------------------------------------|
| C <sub>A</sub> | C <sub>A</sub> | 0.1420 | 392459.2 | aromatic C–C in CNT                 | $b_0$ from Ref., <sup>1</sup> $k_b$ from AMBER03 <sup>3</sup> |
| C <sub>A</sub> | C <sub>B</sub> | 0.1420 | 392459.2 | aromatic C–C in CNT                 | $b_0$ from Ref., <sup>1</sup> $k_b$ from AMBER03 <sup>3</sup> |
| C <sub>A</sub> | C <sub>C</sub> | 0.1420 | 392459.2 | aromatic C–C in CNT                 | $b_0$ from Ref., <sup>1</sup> $k_b$ from AMBER03 <sup>3</sup> |
| C <sub>A</sub> | C <sub>D</sub> | 0.1420 | 392459.2 | aromatic C–C in CNT                 | $b_0$ from Ref., <sup>1</sup> $k_b$ from AMBER03 <sup>3</sup> |
| C <sub>B</sub> | O <sub>A</sub> | 0.1450 | 267776.0 | CNT to OH                           | $b_0$ from Ref., <sup>1</sup> $k_b$ from AMBER03 <sup>3</sup> |
| C <sub>C</sub> | C <sub>E</sub> | 0.1560 | 259408.0 | CNT to COO(H)                       | $b_0$ from Ref., <sup>1</sup> $k_b$ from AMBER03 <sup>3</sup> |
| C <sub>D</sub> | N <sub>A</sub> | 0.1490 | 282001.6 | CNT to NH <sub>2</sub>              | $b_0$ from Ref., <sup>2</sup> $k_b$ from AMBER03 <sup>3</sup> |
| C <sub>D</sub> | N <sub>B</sub> | 0.1490 | 282001.6 | CNT to NH <sub>3</sub> <sup>+</sup> | $b_0$ from Ref., <sup>2</sup> $k_b$ from AMBER03 <sup>3</sup> |
| C <sub>E</sub> | O <sub>A</sub> | 0.1364 | 376560.0 | C–O in COO(H)                       | GAFF                                                          |
| C <sub>E</sub> | O <sub>B</sub> | 0.1229 | 476976.0 | C=O/C–O <sup>−</sup> in COO(H)      | GAFF                                                          |
| O <sub>A</sub> | H <sub>A</sub> | 0.0960 | 462750.4 | O–H in OH                           | GAFF                                                          |
| N <sub>A</sub> | H <sub>B</sub> | 0.1010 | 363171.2 | N–H in NH <sub>2</sub>              | GAFF                                                          |
| N <sub>B</sub> | H <sub>B</sub> | 0.1010 | 363171.2 | N–H in NH <sub>3</sub> <sup>+</sup> | GAFF                                                          |

Table S2: Parameters for atoms connected with two bonds (angular potentials) in the functionalized carbon nanotube force field. Angle equilibrium lengths,  $\theta_0$ , and angle force constants,  $k_\theta$ , were extracted from GAFF based on molecular fragments. The equilibrium angles in the functionalized COO(H)-groups were obtained from previous *ab initio* calculations.<sup>4</sup>  $\theta_0$  is in degrees and  $k_\theta$  is in  $\text{kJ mol}^{-1} \text{rad}^{-2}$ .

| $i$            | $j$            | $k$            | $\theta_0$ | $k_\theta$ | Description                                                              | Source                                                  |
|----------------|----------------|----------------|------------|------------|--------------------------------------------------------------------------|---------------------------------------------------------|
| C <sub>A</sub> | C <sub>A</sub> | C <sub>A</sub> | 120.0      | 527.184    | $\angle\text{C-C-C}$ at linker in CNT (sp2)                              | GAFF                                                    |
| C <sub>A</sub> | C <sub>A</sub> | C <sub>B</sub> | 120.0      | 527.184    | $\angle\text{C-C-C}$ at linker in CNT (sp2)                              | GAFF                                                    |
| C <sub>A</sub> | C <sub>A</sub> | C <sub>C</sub> | 120.0      | 527.184    | $\angle\text{C-C-C}$ at linker in CNT (sp2)                              | GAFF                                                    |
| C <sub>B</sub> | C <sub>A</sub> | C <sub>B</sub> | 120.0      | 527.184    | $\angle\text{C-C-C}$ at linker in CNT (sp2)                              | GAFF                                                    |
| C <sub>B</sub> | C <sub>A</sub> | C <sub>C</sub> | 120.0      | 527.184    | $\angle\text{C-C-C}$ at linker in CNT (sp2)                              | GAFF                                                    |
| C <sub>C</sub> | C <sub>A</sub> | C <sub>C</sub> | 120.0      | 527.184    | $\angle\text{C-C-C}$ at linker in CNT (sp2)                              | GAFF                                                    |
| C <sub>A</sub> | C <sub>B</sub> | C <sub>A</sub> | 109.5      | 334.720    | $\angle\text{C-C-C}$ at adsorption site in CNT (sp3)                     | GAFF                                                    |
| C <sub>A</sub> | C <sub>B</sub> | O <sub>A</sub> | 109.5      | 418.400    | $\angle\text{C-C-O}$ from CNT to OH (sp3)                                | GAFF                                                    |
| C <sub>A</sub> | C <sub>C</sub> | C <sub>A</sub> | 109.5      | 334.720    | $\angle\text{C-C-C}$ from CNT to COO(H) (sp3)                            | GAFF                                                    |
| C <sub>A</sub> | C <sub>C</sub> | C <sub>E</sub> | 109.5      | 334.720    | $\angle\text{C-C-C}$ from CNT to COO(H) (sp3)                            | GAFF                                                    |
| C <sub>A</sub> | C <sub>D</sub> | N <sub>A</sub> | 109.5      | 669.440    | $\angle\text{C-C-N}$ from CNT to NH <sub>2</sub> (sp3)                   | GAFF                                                    |
| C <sub>A</sub> | C <sub>D</sub> | N <sub>B</sub> | 109.5      | 669.440    | $\angle\text{C-C-N}$ from CNT to NH <sub>3</sub> <sup>+</sup> (sp3)      | GAFF                                                    |
| C <sub>C</sub> | C <sub>E</sub> | O <sub>A</sub> | 110.0      | 669.440    | $\angle\text{C-C-O}$ from CNT via C to OH in COO(H)                      | GAFF                                                    |
| C <sub>C</sub> | C <sub>E</sub> | O <sub>B</sub> | 120.0      | 669.440    | $\angle\text{C-C-O}$ from CNT via C to O/O- in COO <sup>-</sup>          | GAFF                                                    |
| O <sub>A</sub> | C <sub>E</sub> | O <sub>B</sub> | 116.5      | 669.440    | $\angle\text{O-C-O}$ in COOH                                             | $\theta_0$ from Ref., <sup>4</sup> $k_\theta$ from GAFF |
| O <sub>B</sub> | C <sub>E</sub> | O <sub>B</sub> | 122.5      | 669.440    | $\angle\text{O-C-O}$ in COO <sup>-</sup>                                 | $\theta_0$ from Ref., <sup>4</sup> $k_\theta$ from GAFF |
| C <sub>B</sub> | O <sub>A</sub> | H <sub>A</sub> | 108.5      | 460.240    | $\angle\text{C-O-H}$ from CNT via O to H in OH                           | GAFF                                                    |
| C <sub>E</sub> | O <sub>A</sub> | H <sub>A</sub> | 120.0      | 418.400    | $\angle\text{C-O-H}$ in COOH (sp2)                                       | $\theta_0$ from Ref., <sup>4</sup> $k_\theta$ from GAFF |
| C <sub>D</sub> | N <sub>A</sub> | H <sub>B</sub> | 110.0      | 394.400    | $\angle\text{C-N-H}$ from CNT via N to H in NH <sub>2</sub>              | GAFF                                                    |
| H <sub>B</sub> | N <sub>A</sub> | H <sub>B</sub> | 107.0      | 345.600    | $\angle\text{H-N-H}$ in NH <sub>2</sub>                                  | GAFF                                                    |
| C <sub>D</sub> | N <sub>B</sub> | H <sub>B</sub> | 110.0      | 386.520    | $\angle\text{C-N-H}$ from CNT via N to H in NH <sub>3</sub> <sup>+</sup> | GAFF                                                    |
| H <sub>B</sub> | N <sub>B</sub> | H <sub>B</sub> | 108.0      | 339.070    | $\angle\text{H-N-H}$ in NH <sub>3</sub> <sup>+</sup>                     | GAFF                                                    |

## List of biomolecules for adsorption free energy calculations

### 1. Aminoacids side chain analogues (except GLY, PRO)

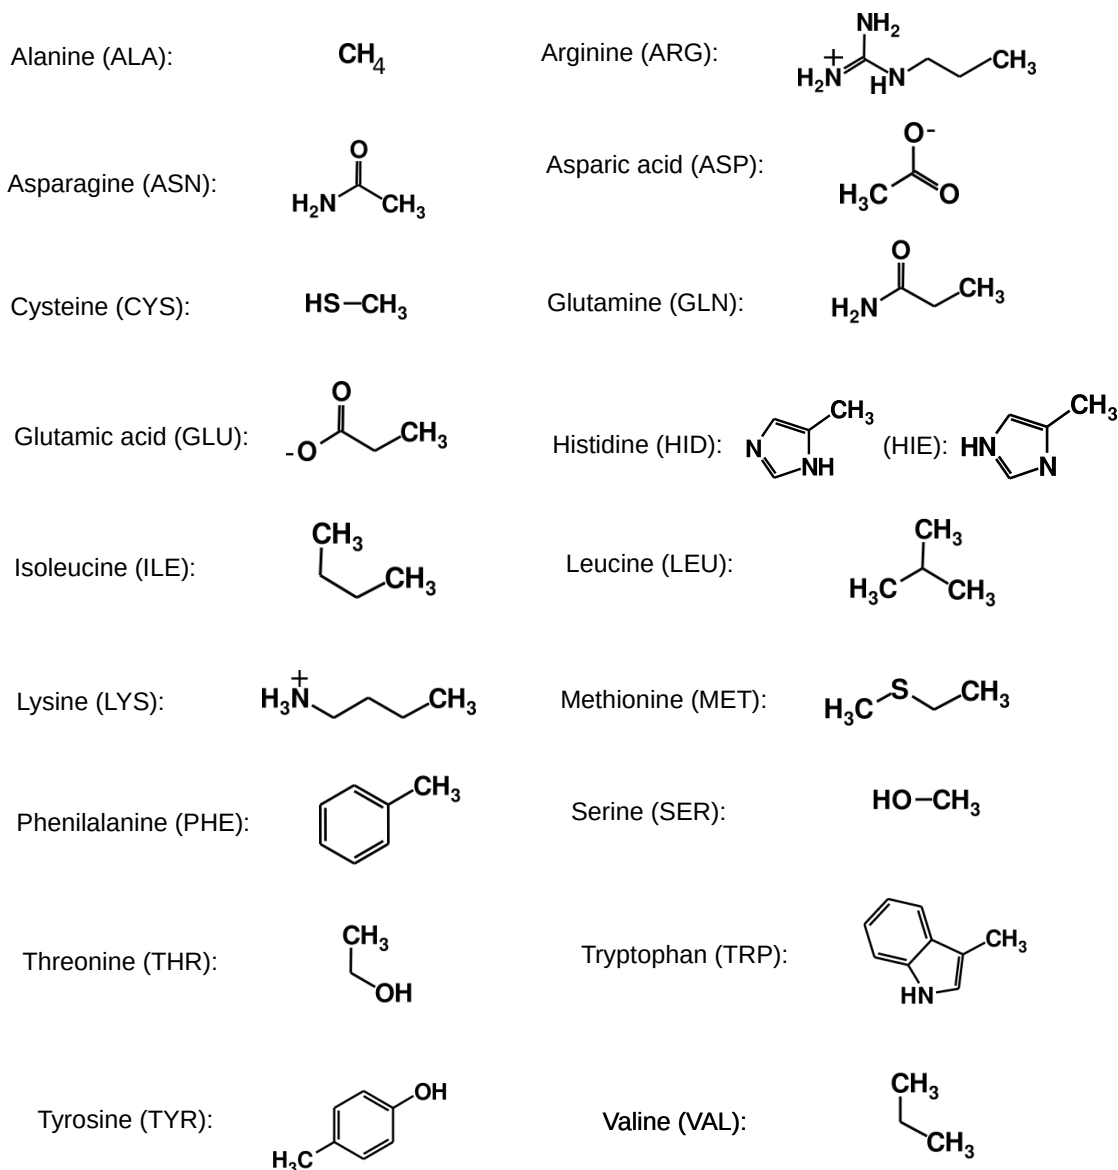

## 2. GLY and PRO aminoacids (with backbone)

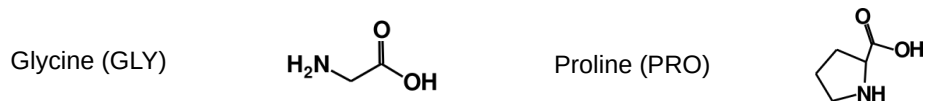

## 3. Alternative forms ( $4 < \text{pKa} < 10$ )

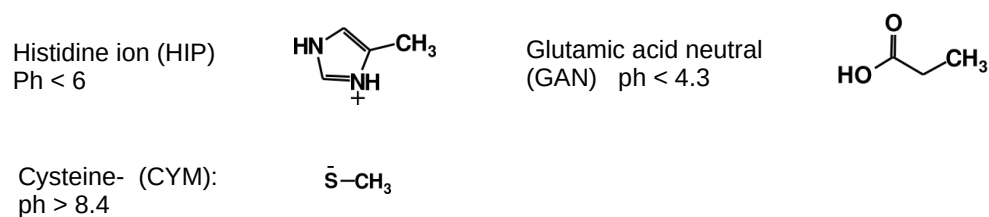

## 4. Lipid fragments

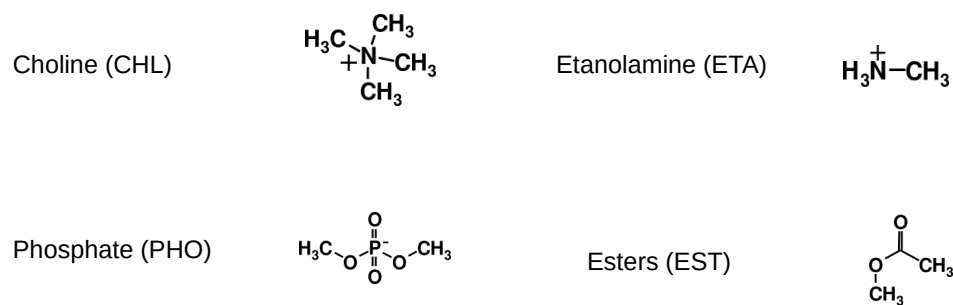

## 5. Glucose

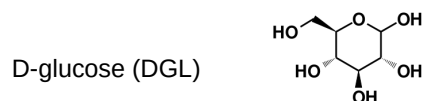

Figure S1: List of biomolecules for adsorption free energy calculations on carbon nanomaterials

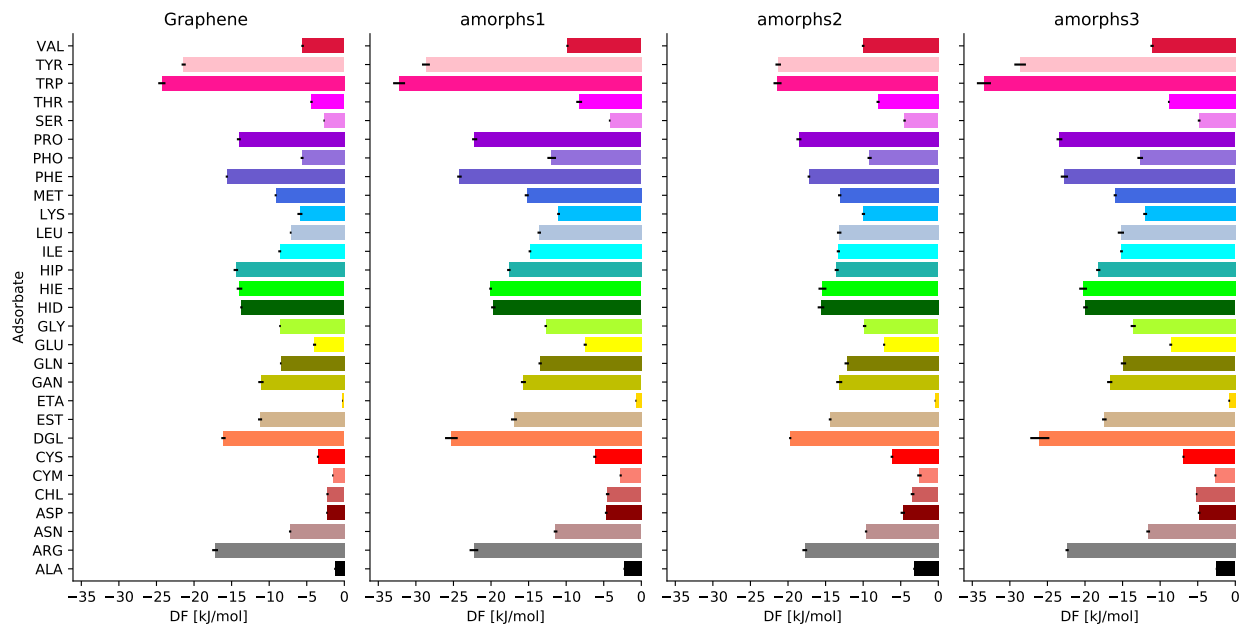

Figure S2: Binding free energies of biomolecules on graphene and three different ta-C slabs.

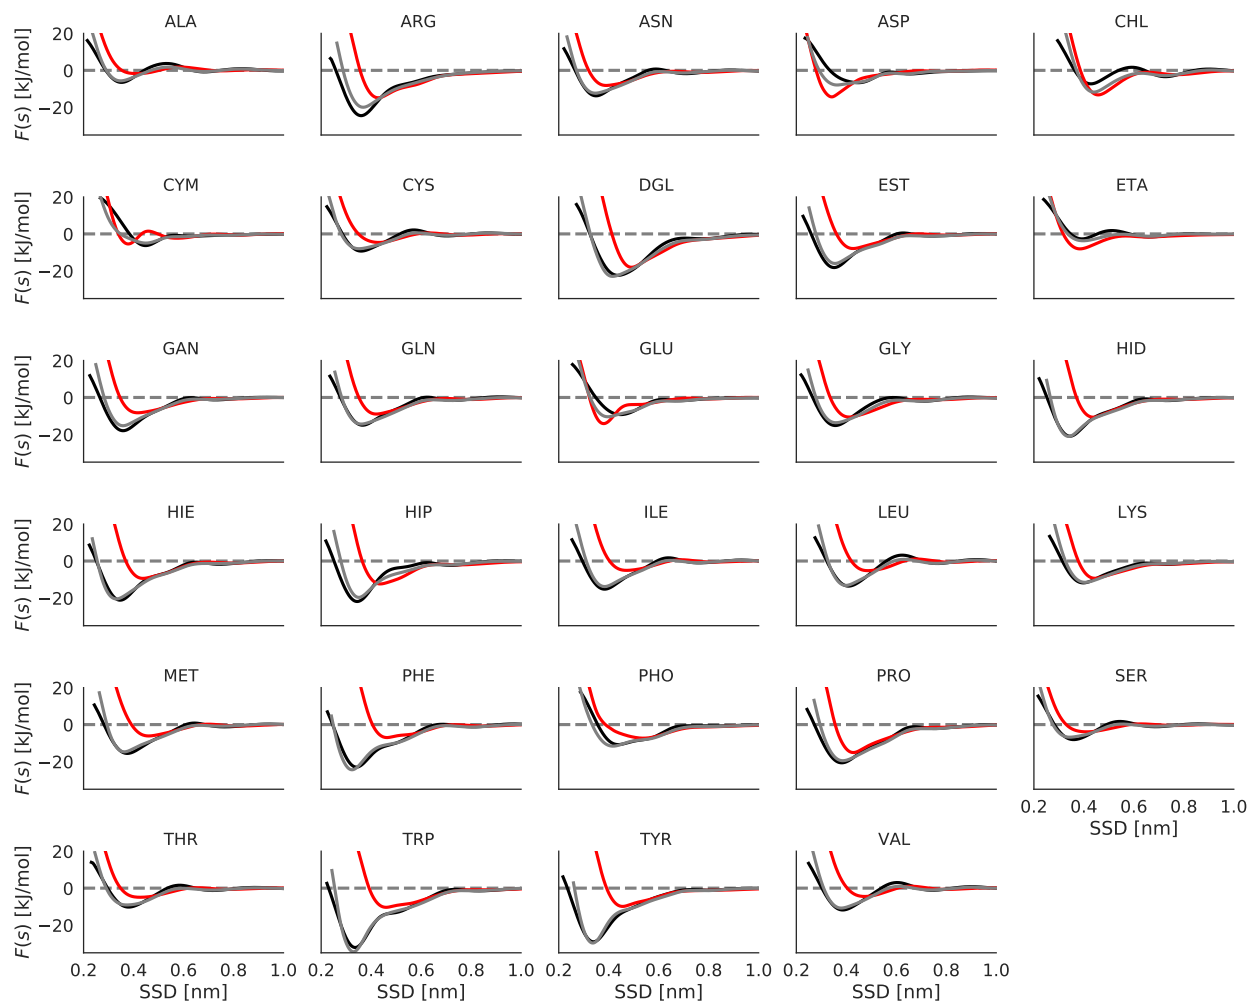

Figure S3: Adsorption profile of different biomolecules on graphene (**black**), grapheneoxide (**red**), and reduced grapheneoxide(**gray**).



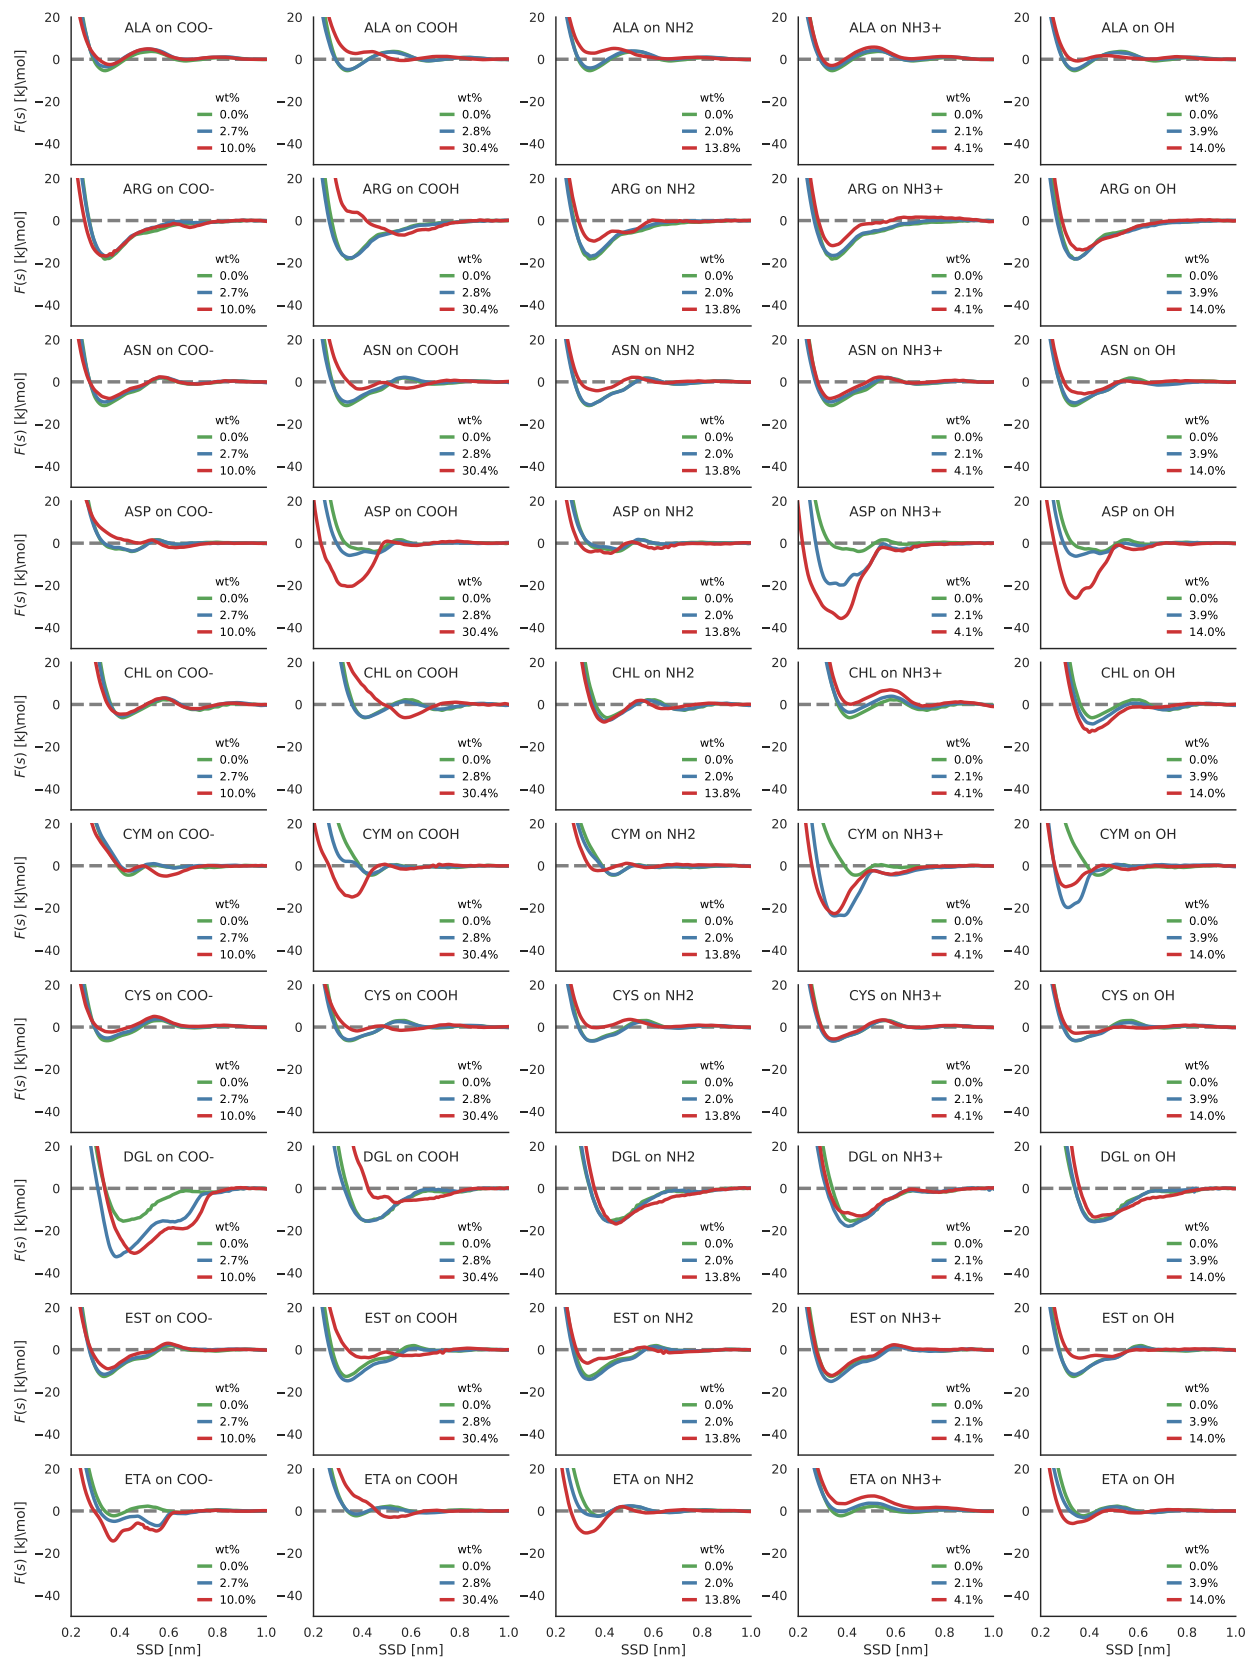

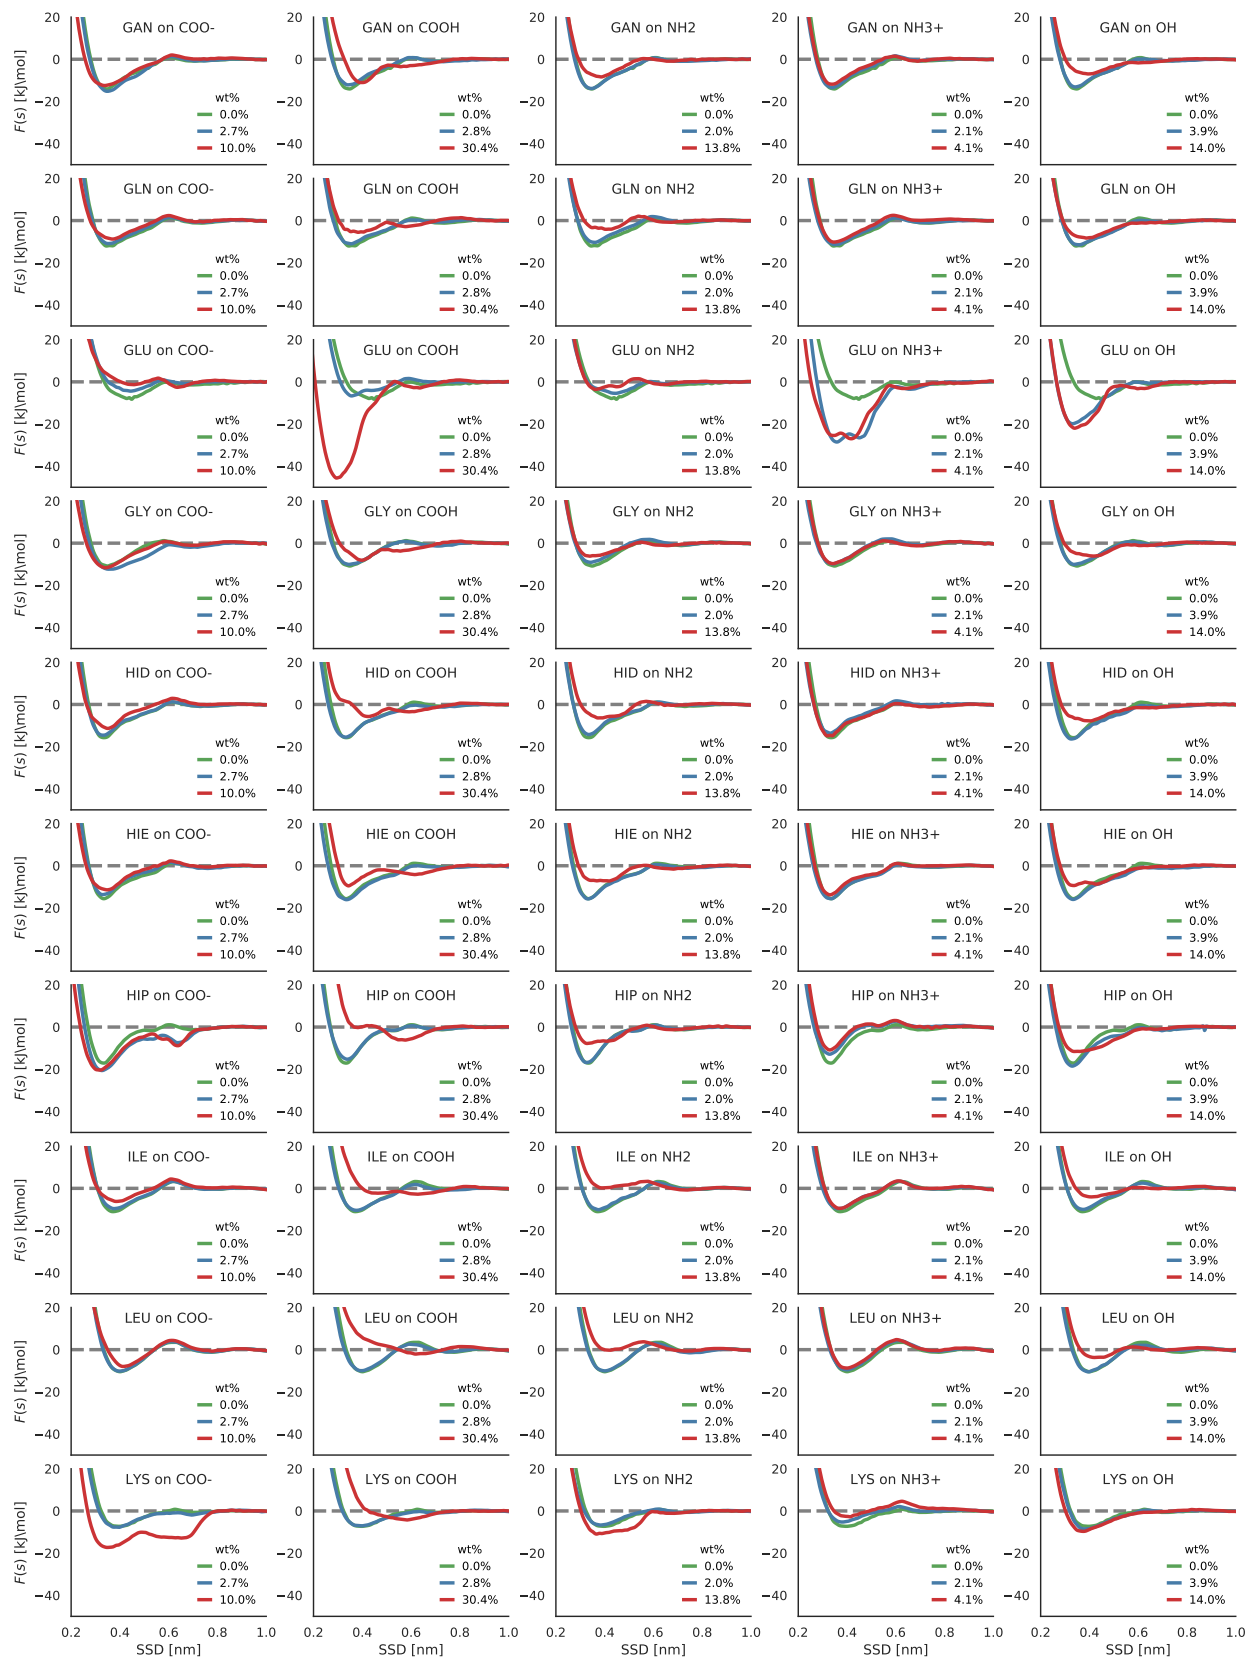

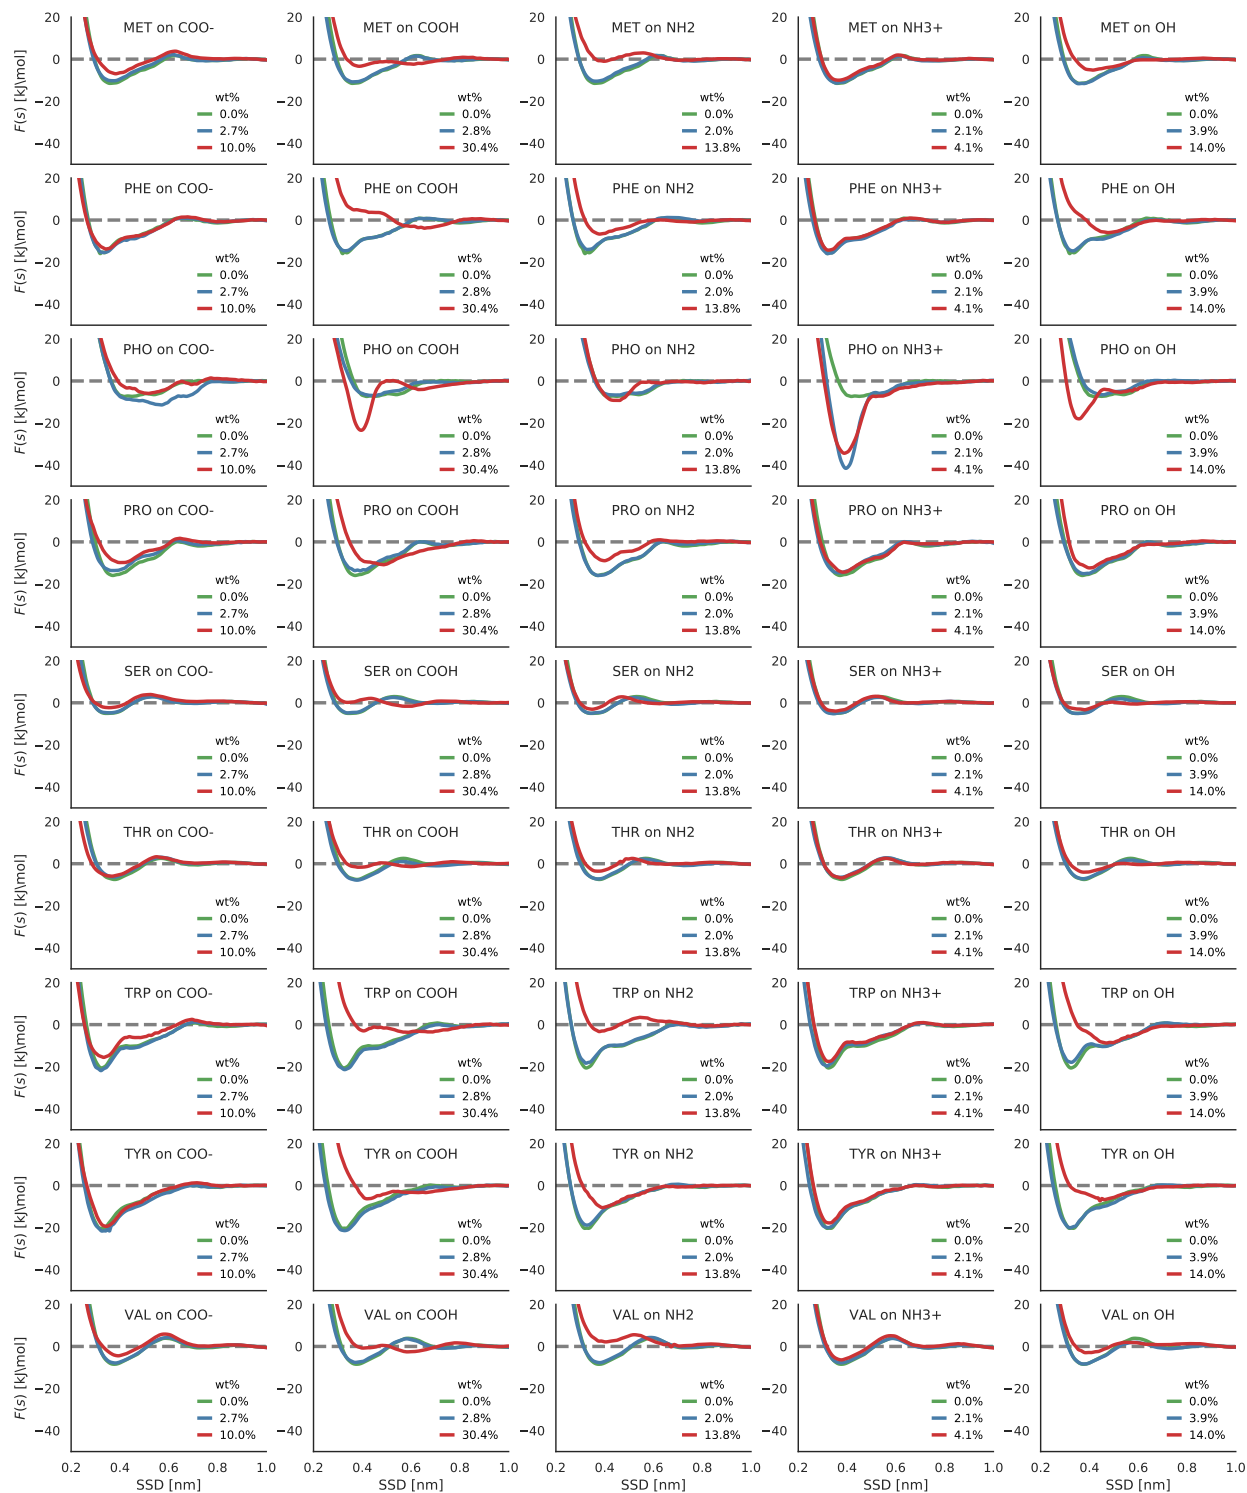

Figure S4: Adsorption profile of different biomolecules on functionalized carbon nanotubes with different groups and different concentrations.

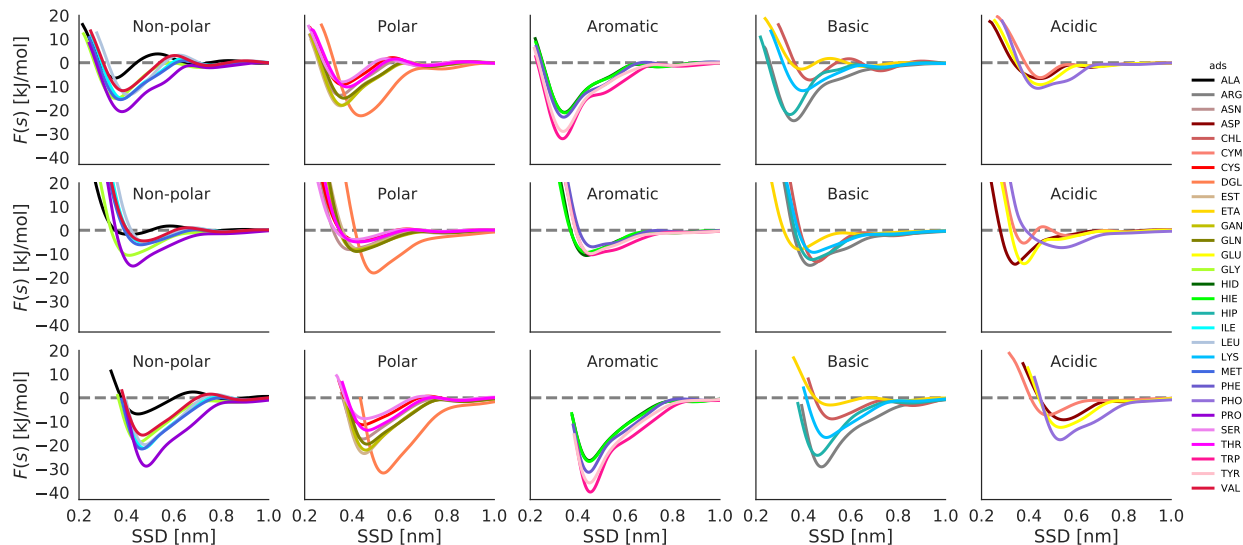

Figure S5: Adsorption profile of all 29 biomolecules grouped into the categories (polar, aromatic, etc) on graphene (**up**), graphene oxide (**middle**), and amorphous carbon(**down**).

## Evaluation of convergence of the simulations and uncertainty of the computed data

We assessed the convergence of the adsorption profiles obtained in AWT-MetaD simulations with statistical forecasting. The analysis is based on the time series,

$$\Delta F_{\text{ads}}(t) = -k_B T \ln \left( \frac{1}{\delta} \int_0^\delta ds e^{-PMF(s,t)/k_B T} \right), \quad (1)$$

where  $PMF(s, t)$  is the adsorption profile obtained by force integration or cumulatively summing the bias up to time  $t$  (so that the “true” adsorption profile is represented by the  $t \rightarrow \infty$  limit). We ignore systematical errors from flawed modeling and assume that insufficient sampling is the only error source. Then,  $\Delta F_{\text{ads}}(t)$  is a correlated time series which converges to a constant value (the binding free energy) in the time limit  $t \rightarrow \infty$ .  $\Delta F_{\text{ads}}(t)$  was modeled with an additive regression model using the open source fb-prophet library.<sup>5</sup> The main component of the time series was modeled with a logistic growth curve, instead of a

linear trend, since the time series is known to converge to the binding free energy at long times. The binding free energies of most adsorbates converged after 200 ns simulation time, but some strong binders required substantially longer times ( $\sim 600$  ns). All our production metadynamics simulations were run for 300 ns if not said otherwise.

In MetaDF simulations with constant Gaussian height, the first 50 ns of simulations were excluded from average force computations. The statistical error was calculated from the variance of results obtained within each of 100 ns fragments of the trajectory. Note, that in the force integration method one does not need to wait that the bias potential converged to exactly compensate the free energy profile; it is enough that it provided sampling over the whole range of the collective variable, which was the cases of all simulations carried out in this work.

We have investigated 1D free energy profile of biomolecules on carbon nanomaterial surfaces using AWT-MetaD and MetaDF simulations. These simulations do not impose any restrictions on sidechain orientations, that is why these effects are fully accounted for provided that simulation time is long enough to adequately sample the orientational degrees of freedom. We have prolonged several simulations up to 1000 ns allowing biomolecules to adopt different orientations and conformations with respect to the surface and hydrogen bound to water and functional groups at the surfaces. To validate the PMF convergence, as well as to compare AWT-MetaD and MetaDF, we have computed time series of adsorption profile for different biomolecules categories on different carbon nanomaterial surfaces. The results are shown in Figure S6. For graphene surface, both MetaDF and AWT-MetaD reach the same PMF after 200 ns of the simulations, though PMF profile with AWT-MetaD is slower to be converged. For grapheneoxide surface the PMFs converge typically within 600 ns if computed with MetaDF, but for some stronger binder such as GLU, AWT-MetaD does not show converged profile even at longer simulation time. Since the PMF is not changing by increasing the simulation for different biomolecules categories, it validates that sampling was adequate to produce reliable results.

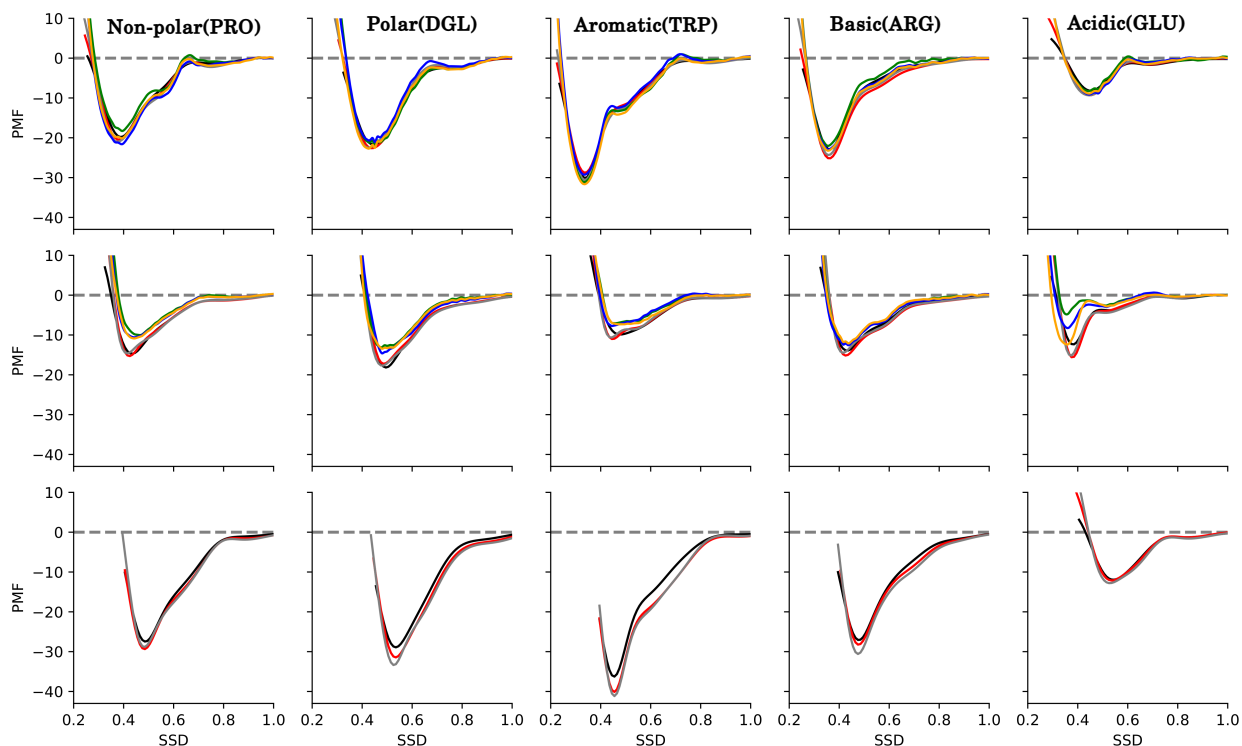

Figure S6: Time evolution of free energy profile for adsorption of representative biomolecule in each group on graphene (Upper row), grapheneoxide (middle row), and amorphous carbon(lower row) surfaces colored as follow. **MetaDF**: black, red, gray at 100 ns, 200 ns, and 300 ns for graphene and amorphous carbon and at 300 ns, 600 ns, and 900 ns for grapheneoxide. **AWT-MetaD**: green, blue, orange at 100 ns, 200 ns, and 300 ns for graphene and at 300 ns, 600 ns, and 900 ns for grapheneoxide.

## References

- (1) Milowska, K. Z.; Majewski, J. A. Functionalization of Carbon Nanotubes With  $-\text{CH}_n$ ,  $-\text{NH}_n$  Fragments,  $-\text{COOH}$  and  $-\text{OH}$  Groups. *J. Chem. Phys.* **2013**, *138*, 194704.
- (2) Veloso, M. V.; Souza Filho, A. G.; Mendes Filho, J.; Fagan, S. B.; Mota, R. Ab Initio Study of Covalently Functionalized Carbon Nanotubes. *Chem. Phys. Lett* **2006**, *430*, 71–74.
- (3) Duan, Y.; Wu, C.; Chowdhury, S.; Lee, M. C.; Xiong, G.; Zhang, W.; Yang, R.; Cieplak, P.; Luo, R.; Lee, T.; Caldwell, J.; Wang, J.; Kollman, P. A Point-Charge

Force Field for Molecular Mechanics Simulations of Proteins Based on Condensed-Phase Quantum Mechanical Calculations. *J. Comput. Chem.* **2003**, *24*, 1999–2012.

- (4) Lara, I. V.; Zanella, I.; de Souza Filho, A. G.; Binotto Fagan, S. Influence of Concentration and Position of Carboxyl Groups on the Electronic Properties of Single-Walled Carbon Nanotubes. *Phys. Chem. Chem. Phys.* **2014**, *16*, 21602–21608.
- (5) Taylor, S. J.; Letham, B. Forecasting At Scale. *Am. Stat.* **2017**, *0*, 0–0.
